# Supplementary material
Source: publisher figshare collection journal article supplement (https://karger.figshare.com/ndownloader/files/35887106)
Supplement: Supplementary file 1 [file 35887106]

@Begin

@Languages: spa

@Participants: CHI Informant, MOT Mother, SJR Speech Therapist, SIS Sister,

SPL Speech Therapist

@Options: CA

@ID: spa|CHROMOLANG|CHI|7;11|female|||Informant|||

@ID: spa|CHROMOLANG|MOT|||||Mother|||

@ID: spa|CROMOLANG|SJR|||||Therapist|||

@ID: spa|CROMOLANG|SIS|||||Sister|||

@ID: spa|CROMOLANG|SPL|||||Therapist|||

@Transcriber: Maite Fernández Urquiza

@Time Duration: 00:10:18

@Media: BRL_7 (min 0:00-6:48 y 9:35-13:00)

@Date: 10-APR-2019

@Location: Córdoba

@Situation: Room at the Speech Language Therapy Clinic

@Activities: CHI is playing with SIS

@Comment: Microdeletion in 2p16.3

*MOT: tú qué estás [=! deleted /s/, dialectal] separando <las verdes>

[=! deleted /s/, dialectal] o <las negras>

[=! deleted /s/, dialectal] „ Beatriz ?

*CHI: 0 .

*MOT: eh ?

*CHI: 0 .

*MOT: Beatriz !

*SIS: Beatriz .

*CHI: 0.

*MOT: cuál estás [=! deleted /s/, dialectal] separando (.) <las verdes>

[=! deleted /s/, dialectal] o <las negras>

[=! deleted /s/, dialectal] ?

*CHI: <a vele> [*].

%err: a=las $PHO; vele=verdes $PHO

%xepr: $i5:MMN:ORD:OMI; $i5:MMN:ORD:OMI; $i5:MMN:ORD:SST

*MOT: <las ve:rdes> [=! deleted /s/, dialectal] (.) va:le@i .

*SIS: pues [=! deleted /s/, dialectal] ahora tienes

[=! deleted /s/, dialectal] que juntar [=! deleted /r/, dialectal]

(.) Beatriz +//.

*SIS: una (.) mira@i (.) sí esta pa(ra)@d mí [=! whispering to herself].

*SIS: separa estas [=! deleted /s/, dialectal]

[=! gives some little sticky toy balls to CHI] .

*MOT: y <esas [=! deleted /s/, dialectal] de:> [/] esas de qué color son „

Beatriz ?

*CHI: doja [*].

%err: doja=rojas $PHO.

%xepr: $i5:MMN:ORD:SST

*MOT: vale@i muy bien .

*SJR: me da a mí la impresión de que la casita dará opciones a más hablar

que esto (.) &*MOT: uhum@i.

*SJR: que eso no da opciones a hablar.

*SJR: lo vamos a guardar (.) Cristina (.) vale@i ?

*SIS: vale@i.

*SJR: y va a sacar (.) hu:m@i (.) Encarna (.) va a sacar la casita (.) la

granja esa roja „ vale@i ?

*SIS: ay@i se me ha caído !

*SJR: y jugáis <a la> [/-] con la casita „ vale@i ?

*SJR: www.

*MOT: www.

*CHI: <pul-le> [/] pul-le

[=! assimilation /θ/ > /l/ , dialectal; looking to the toy house].

%err: pul-le=puzle=casa $LEX $MOR

%sit: SPL puts a toy house on the table

%xepr: $i5:MMN:ORD:SST ; $i5:MMN:ORD:OMI; $i5:MRL:RPT:NRL:ICOM

*SPL: no: car [/-] esto no es [=! deleted /s/, dialectal] un pulle

[=! assimilation /θ/ > /l/ , dialectal] .

*SPL: sabes [=! deleted /s/, dialectal] lo que es

[=! deleted /s/, dialectal] ?

*CHI: 0.

*SPL: es una: (.) qué ?

*CHI: 0.

*MOT: qué es [=! deleted /s/, dialectal] „ Beatriz

[=! touching CHI's shoulder ] ?

*CHI: 0.

*SIS: Beatriz ‡ saca todas las cosas „ vale@i ?

*CHI: toma [=! helping SIS] .

*MOT: pero escúchame „ Beatriz .

*CHI: 0 [=! ignores MOT and keeps helping SIS with the toys ].

*MOT: <vamos a ir > [=! deleted /s/ and /r/, dialectal] [/] <vamos a ir>

[=! deleted /s/ and /r/, dialectal] nombrando lo que es

[=! deleted /s/, dialectal] cada cosa „ vale@i ?

*CHI: 0.

*MOT: eh ?

*CHI: 0.

*MOT: poquito a poco (.) poquito a poco .

*SIS: mira el cojín (.) uy@ <qué bonito el cojín> [>] .

*MOT: déjala tú que mueva [<] ella [=! to SIS] xxx xxx „ vale@i ?

*SIS: sí (.) estoy sacando <las cosas>

[=! deleted /s/ in final word position, dialectal] .

*MOT: pero la tienes [=! deleted /s/ in final word position, dialectal]

que ir dejando tú xxx que ella haga <las cosas>

[=! deleted /s/, dialectal] porque si no +//.

*MOT: <ala@i Beatriz (.) esto qué es> [=! ] ?

*MOT: qué es esto ?

*CHI: dio [?] [=! CHI grabs a toy cupboard].

%err: dio=un armario $PHO $MOR

%xepr: $i5:MMN:ORD:OMI; $i5:MMN:ORD:SST

*MOT: <un qué> ?

*SIS: de qué <color es> [=! deleted /s/ and /r/, dialectal] [>]?

*MOT: eso qué es [=! deleted /s/, dialectal] [<] (.) un qué ?

*CHI: 0 [=! plays with the toy cupboard].

*MOT: qué es [=! deleted /s/, dialectal] „ Beatriz ?

*CHI: armadio [*].

%err: armadio=un armario $PHO $MOR

%xepr: $i5:MMN:ORD:OMI; $i5:MMN:ORD:SST

*MOT: un armario: y ahí qué se guarda „ Beatriz ?

*CHI: 0 [=! plays with the toy house ignoring MOT].

*MOT: qué se guarda ahí ?

*CHI: (0.5) arma:dio !

%err: armadio=un armario $PHO $MOR

%xepr: $i5:MMN:ORD:OMI; $i5:MMN:ORD:SST; $i5:MRL:ASW:NRL:PER

*MOT: pero en el armario qué es [=! deleted /s/, dialectal] lo que

guardamos [=! deleted /s/, dialectal] en casa „ eh ?

*CHI: <e dopa> [*] .

%err: e dopa=la ropa $PHO $MOR

%xepr: $i5:MMN:ORD:SST; $i5:MMN:ORD:SST

*MOT: ah@i claro@i la ropa (.) muy bien .

*SIS: venga@i ahora (.) <Beatriz (.) tenemos [=! deleted /s/, dialectal]

que ordenar [=! deleted /r/, dialectal] [>] .

*MOT: ay@i y eso qué es [=! deleted /s/, dialectal] [<] ?

*MOT: eso qué es [=! deleted /s/, dialectal] „ Beatriz ?

*CHI: papal [*] .

%err: papal=papel=una silla $PHO $LEX

%xepr: $i5:MMN:ORD:SST; $i5:MMN:ORD:OMI; $i5:MRL:ASW:NRL:IMM

*MOT: no (.) papel no [=! laughs].

*SIS: papel [=! laughs].

*MOT: eso qué es [=! deleted /s/, dialectal] mira@i (.) Beatriz (.) vamos

[=! deleted /s/, dialectal] a ver [=! deleted /r/, dialectal] ven@i

[=! grabs a toy chair from CHI's hands and puts it on the table].

*MOT: esto qué es [=! deleted /s/, dialectal] ?

*CHI: zilla [*].

%err: zilla=una silla $PHO $MOR.

%xepr: $i5:MMN:ORD:SST; $i5:MMN:ORD:OMI

*MOT: silla.

*SIS: Beatriz ‡ <tenemos [=! deleted /s/, dialectal] que guardar

[=! deleted /r/, dialectal] esto> [/-] tenemos

[=! deleted /s/, dialectal] que ordenar [=! deleted /r/, dialectal]

la casa „ vale@i ?

*CHI: ezo [*] [=! tries to grab something in order to help SIS].

%err: ezo=eso $PHO

%xepr: $i5:MMN:ORD:SST

*MOT: venga@i pero: &ve vele di [/-] tú diciendo Cristina que lo haga

ella .

*SIS: Beatriz ‡ pon esto aquí encima [=! gives CHI a toy lamp ].

*CHI: aquí [=! grabs the lamp and puts it into the toy house].

*MOT: pero tú déjala a ella que ella lo haga como ella quie [/-] crea.

*SIS: vale@i allí mejor (.) sí [=! smiles].

*MOT: venga@i <ahora tú> [/] ahora tú otra: [/-] pon [/] pon otra cosita

tú .

*SIS: esta uy@i [=! drops a toy lamp] esta [=! gives the lamp to CHI].

*SIS: xxx xxx la tienes [=! deleted /s/, dialectal] que poner

[=! deleted /r/, dialectal] aquí.

*CHI: 0 [=! CHI follows SIS's indications]. [+ trn]

%xepr: $et3:GSA

*SIS: ahora coge otra cosa .

*CHI: esta [=! CHI grabs a toy stair and gives it to SIS].

*SIS: a ver@i la escalera dónde va .

*MOT: déjala [/] déjala [/] déjala que ella la ponga „ Cristina .

*MOT: déjala tú (.) la tienes [=! deleted /s/, dialectal] que <dejar que

ella lo haga> [>] .

*SIS: pon la escalera [<] donde quieras [=! deleted /s/, dialectal] .

*CHI: adí [*] xxx xxx [=! CHI tries to put the stair into the house] .

%err: adí=aquí $PHO

%xepr: $i5:MMN:ORD:SST

*SIS: no puede .

*MOT: no: sí (.) tú déjala a ella .

*CHI: aquí [=! CHI doesn't manage to put the stair in the right place] .

*SJR: es zurda ?

*CHI: allí o aquí ?

*MOT: sí (.) zurda pero total .

*CHI: aquí o aquí [=! to SIS] ?

*SIS: venga@i anda@i que te ayudo yo .

*SIS: uy@i creo que yo tampoco sé dónde va .

*SIS: asín@d Beatriz „ vale@i [=! SIS puts the stair into the toy house] ?

*SIS: esto se deja asín@d „ vale@i ?

*CHI: va:le@i !

*MOT: y ahora el muñeco por dónde va a subir „ Beatriz ?

*SIS: u:y@i [=! SIS drops something] !

*CHI: 0 [=! grabs a toy man and puts it on the stair] . [+ trn]

%xepr: $et3:GSA

*SIS: por la escalera .

*SIS: a ver@ <vamos a ordenar>

[=! deleted /s/ and /r/ in final word position, dialectal] <más

cosas> [=! deleted /s/ in final word position, dialectal] .

*SIS: qué cosas quieres coger

[=! deleted /s/and /r/ in final word position, dialectal] ahora ?

*CHI: esto [=! CHI grabs a puppet ] .

*SIS: no (.) <los muñecos los vamos a dejar>

[=! deleted /s/ and /r/, dialectal] aquí (.) y ahora: +//.

*CHI: esto [=! CHI grabs a toy bed].

*SIS: +,<tenemos que ordenar>

[=! deleted /s/ and /r/ in final word position, dialectal] <la

casa> [>] .

*MOT: <eso qué es [=! deleted /s/, dialectal] „ Beatriz> [<] ?

*SIS: <esto qué es> [=! deleted /s/ , dialectal] [/] esto qué es

[=! deleted /s/, dialectal] [/] esto qué es

[=! deleted /s/, dialectal] [=! to SPL] [>]?

%sit: SIS grabs the toy bed

*MOT: tienes [=! deleted /s/, dialectal] que nombrarlo [<] .

*CHI: cama .

%err: cama=una cama $MOR

%xepr: $i5:MMN:ORD:OMI

*SIS: ah@i hombre@i !

*CHI: yo [=! tries to grab the toy bed again] .

*SIS: a ver@i la cama: quieres [=! deleted /s/, dialectal] que la

pongamos [=! deleted /s/, dialectal] aquí ?

*CHI: zí [*].

%err: zí=sí $PHO

%xepr: $i5:MMN:ORD:SST

*SIS: aunque te se sale xxx .

*MOT: <y ahí quié> [/-] ahí quién se va a acostar

[=! deleted /r/, dialectal] „ Beatriz ?

*MOT: ahí quién se <va a acostar> [=! deleted /r/, dialectal] [>]?

*SIS: Beatriz ‡ qué tenemos [=! deleted /s/ , dialectal] [<] que poner

[=! deleted /r/ , dialectal] [>]?

*MOT: espérate Cristina [<]

*CHI: yo .

%xepr: $i5:MQL:ASW:IMM

*MOT: espérate [=! to SIS] .

*MOT: ahí quién se va a acostar en la cama ?

*CHI: yo .

%xepr: $i5:MQL:ASW:IMM

*MOT: tú [=! ] ?

*MOT: venga@i pues [=! deleted /s/ , dialectal] coge una muñeca como si

fueras [=! deleted /s/ , dialectal] tú a ver@i .

*CHI: na:@d .

*MOT: no: ?

*MOT: sí: !

*CHI: toma [=! gives a toy sink to SIS].

*SIS: ahora (.) a ver eso dónde se pone .

*SIS: a ver esto qué es [=! deleted /s/, dialectal]

[=! grabs the sink] .

*SIS: esto qué es [=! deleted /s/, dialectal]

[=! showing the sink to MOT] ?

*MOT: a ver@i qué es [=! deleted /s/, dialectal] eso „ Beatriz ?

*SIS: qué es [=! deleted /s/, dialectal] eso „ Beatriz ?

*CHI: epejo [*].

%err: epejo= un espejo $PHO $MOR

%xepr: $i5:MMN:ORD:OMI; $i5:MMN:ORD:OMI

*MOT: un espejo (.) <muy bien> [>] .

*SIS: un espejo [<] pero: (.) en concreto qué es

[=! deleted /s/, dialectal] esto ?

*SJR: un lavabo .

*MOT: un lavabo (.) para lavarse qué „ Beatriz ?

*SIS: esto se tiene que poner aquí .

*CHI: a ma:no [*] .

%err: a mano=las manos $PHO

%xepr: $i5:MMN:ORD:OMI

*MOT: muy bien .

*SIS: muy bien (.) así [=! fixing something in the toy house] .

*CHI: a mí .

*MOT: venga@i ahora déjala a ella Cristi (.) ella sola .

*SIS: venga@i qué <quieres poner>

[=! deleted /s/ and /r/ in final word position, dialectal] ?

*CHI: elo [*] [=! CHI pronounces an inexistent sound between /s/ and /l/].

%err: elo=eso $PHO .

%xepr: $i5:MMN:ORD:SST

*SIS: la mesa [=! grabs the toy table] !

*SIS: uy@i claro@i la mesa tendría que ir aquí.

*MOT: dónde <vamos a poner> [=! deleted /s/ and /r/, dialectal] la mesa

„ Beatriz ?

*CHI: aquí [=! pointing to the toy house] .

*SIS: en el lavabo ?

*MOT: no hombre@i !

*SIS: <quieres que la pongamos> [=! deleted /s/, dialectal] <aquí fuera>

[>] ?

*MOT: eso qué es [=! deleted /s/, dialectal] [<] ?

*CHI: zí [*] [=! to SIS] .

%err: zí=sí $PHO.

%xepr: $i5:MMN:ORD:SST

*MOT: qué has [=! deleted /s/, dialectal] abierto „ Beatriz ?

*SIS: esto es [=! deleted /s/, dialectal] un jardín „ vale@i ?

*SIS: esto es [=! deleted /s/, dialectal] un jardín &*MOT: uhum@i .

*CHI: esto [=! grabs a toy bathtub] !

*SIS: la bañera !

*CHI: lucha [*].

%err: lucha=la ducha $PHO $MOR

%xepr: $i5:MMN:ORD:SST; $i5:MMN:ORD:OMI

*MOT: la ducha.

*SIS: bueno pues [=! deleted /s/, dialectal] la ducha (.) ahí .

*CHI: 0 [=! changes the position of the bathtub]. [+ trn]

%xepr: $et3:GSA

*SIS: vale@i ahí .

*SIS: ahora qué [/-] esto qué es un cojín ?

*SIS: ah@i esto seguramente es [=! deleted /s/, dialectal] para esto .

*MOT: venga@i ahora tú „ Beatriz .

*SIS: ahora qué quieres [=! deleted /s/, dialectal] ?

*CHI: esto [=! gives a toy chair to SIS] (..) zilla .

%err: zilla=la silla $PHO $MOR

%xepr: $i5:MMN:ORD:SST; $i5:MMN:ORD:OMI

*SIS: la: silla .

*SIS: pos@d mira@i la silla la podemos [=! deleted /s/, dialectal] poner

[=! deleted /r/, dialectal] aquí „ vale@i ?

*SIS: <quieres poner>

[=! deleted /s/ and /r/ in final word position, dialectal] uy@i

perdón [=! laughs] .

*SIS: <quieres poner>

[=! deleted /s/ and /r/ in final word position, dialectal] otra

silla ?

*CHI: zí [=! gives a toy chair to SIS ].

%err: zí=sí $PHO

%xepr: $i5:MMN:ORD:SST

*MOT: ponla tú ponla tú .

*SIS: toma [=! gives the toy chair back to CHI] ponla tú (.) ponla al

lao@d de la mía.

*CHI: 0 [=! CHI puts the chair in the place indicated by SIS]. [+ trn]

%xepr: $et3:GSA

*SIS: a ver@i (.) a ver si hay más sillas [=! deleted /s/, dialectal] .

*SIS: esto qué es [=! deleted /s/, dialectal]

[=! grabs another toy chair].

*SIS: otra silla .

*CHI: yo !

*SIS: pues [=! deleted /s/, dialectal] aquí se va a poner

[=! deleted /r/, dialectal] (.) ponla ahí .

*SIS: po:n +/.

*MOT: déjala [?] a ella [/] ella (.) Cristina (.) déjala a ella.

*SIS: +, esta silla al otro lao@d .

*CHI: aquí [=! grabs the chair and puts it in its place].

*SIS: bue:no@i bien .

*CHI: aquí: ezo !

%err: ezo=eso $PHO

%xepr: $i5:MMN:ORD:SST

*MOT: y eso <qué es [=! deleted /s/, dialectal] > ?

*SIS: el armario [=! grabs the toy cupboard] [<] !

*MOT: qué hemos [=! deleted /s/, dialectal] dicho que es

[=! deleted /s/, dialectal] ?

*MOT: pero déjala a ella „ Cristina .

*SIS: sí sí .

*CHI: ababio [*].

%err: ababio=el armario $PHO $MOR

%xepr: $i5:MMN:ORD:SST; $i5:MMN:ORD:OMI

*SIS: Beatriz ‡ <quieres que pongamos> [=! deleted /s/, dialectal] algo:

dentro del armario ?

*CHI: zí: .

%err: zí=sí $PHO

%xepr: $i5:MMN:ORD:SST

*SIS: el qué ?

*CHI: +^ ezto .

%err: ezto=esto $PHO

%xepr: $i5:MMN:ORD:SST

*SIS: +^ <ponemos los cojines> [=! deleted /s/, dialectal] ?

*CHI: te [?] zí (.) te [?] zí .

%err: zí=sí $PHO

%xepr: $i5:MMN:ORD:SST

*SIS: <pues dame los cojines> [=! deleted /s/, dialectal] [>].

*CHI: ezto [<] y ezto .

%err: ezto=esto $PHO

%xepr: $i5:MMN:ORD:SST

*SIS: esto qué es [=! deleted /s/, dialectal] ?

*SJR: eso es una lechera .

*SIS: lechera (.) a ver si encontra +//.

*SIS: este [/-] <quieres que pongamos> [=! deleted /s/, dialectal] este

cojín ?

*CHI: zí [=! CHI hits the table repeteadly] .

%err: zí=sí $PHO

%xepr: $i5:MMN:ORD:SST

*SIS: cojines de: [/] de repuesto (.) ciérralo tú „ Beatriz.

*CHI: 0 [=! CHI tries to close the cupboard]. [+ trn]

%xepr: $et3:GSA

*SIS: <hemos puesto demasiados cojines>

[=! deleted /s/ in final position of the word, dialectal] .

*CHI: xxx xxx xxx .

*SIS: venga@i el armario este dónde se pondría ?

*MOT: dónde [/-] a ver@i dónde lo <vas a poner>

[=! deleted /s/ and /r/ in final position of the word, dialectal]

tú „ Beatriz ?

*SIS: +^ a ver @i dónde lo <quieres poner>

[=! deleted /s/ and /r/ in final position of the word, dialectal] ?

*CHI: aquí [=! points to the toy house bathroom] .

%xepr: $i5:MQL:ASW:WOR:IMM

*MOT: ahí <en el cuarto de baño> [>] ?

*SIS: <en el cuarto de baño> [<]?

*CHI: no (0.4) <aquí [=! pointing to a different place] (.) aquí (.)

aquí> [>].

%xepr: $et4:RPR:OTH

*SJR: bueno@i vamos a guardar las cosas de la casa .

*SJR: www.

*MOT: www.

*SJR: vamos a jugar <a que:> [/] a que Beatriz le explique a mamá que es

lo que vemos en las imágenes vale@i „ cariño ?

*MOT: www.

*CHI: www.

*SIS: www.

*SJR: www.

*SIS: qué ves [=! deleted /s/, dialectal] aquí „ Beatriz ?

%sit: SIS is showing a picture to CHI so that she describes it .

*CHI: 0.

*SIS: Beatriz ‡ qué ves [=! deleted /s/, dialectal] ?

*CHI: lucha [?] .

*SIS: a ver@i esto qué es [=! deleted /s/, dialectal] ?

*MOT: quién hay ahí ?

*SIS: qué está haciendo ?

*CHI: fafé [?] [*].

%err: fafé=un pastel $PHO $MOR

%xepr: $i5:MMN:ORD:SST; $i5:MMN:ORD:OMI

*CHI: niño .

%err: niño=un niño $MOR

%xepr: $i5:MMN:ORD:OMI

*SIS: una niña (.) pero es niño o niña ?

*CHI: niño .

*SIS: no .

*CHI: niña.

%xepr: $et4:RPR:OTH

*SIS: y: qué está haciendo la niña ?

*CHI: comer [=! deleted /r/, dialectal]

[=! pointing to the cake in the picture] .

%xepr: $i5:MRL:ASW:TNG

*SIS: comer [=! deleted /r/, dialectal] pero: (.) antes de comer

[=! deleted /r/, dialectal] qué se tiene que hacer

[=! deleted /r/, dialectal] ?

*CHI: agua [=! pointing to the cake in the picture] .

%xepr: $i5:MRL:ASW:NRL:ICOM

*MOT: no: .

*SIS: no (.) coci: +//.

*CHI: (0.7) cocinar [=! deleted /r/, dialectal] .

%xepr: $et4:RPR:OTH

*SJR: vale@i pasa a la siguiente .

*CHI: a iguiente .

%err: a iguiente=la siguiente $PHO.

%xepr: $i5:MMN:ORD:OMI:ECO

*SIS: sí sí la siguiente [=! smiling].

*SIS: a ver@i quién hay aquí ?

*CHI: niño [=! pointing to the boy in the pic ].

%err: niño=un niño $MOR .

%xepr: $i5:MMN:ORD:OMI

*SIS: <un niño> [>].

*SJR: <no le digas> [<] quién tú se [/-] enséñasela y le dices +"/.

*SJR: +" qué hay?

*SIS: qué hay ?

*SJR: qué hay ahí ?

*CHI: ezo [=! pointing to a music player in the picture].

%err: ezo=eso $PHO

%xepr: $i5:MMN:ORD:SST; $i5:MQT:VUT

*SIS: pero esto cómo se llama ?

*CHI: 0.

*SIS: a ver@i nosotros qué [/] qué hacemos para: +//.

*CHI: al+la [*].

%err: al+la=baila $PHO $MOR

%xepr: $i5:MMN:ORD:OMI; $i5:MMN:ORD:SST; $i5:MRL:ASW:TNG

*SIS: bailar [=! deleted /r/, dialectal] pero qué [/] qué se hace para

bailar [=! deleted /r/, dialectal] ?

*CHI: azí [*] [=! moves as if she were dancing].

%err: azí=así $PHO

%xepr: $i5:MMN:ORD:SST; $i5:MRL:ASW:TNG:ICOM:LIT

*SIS: sí pero co:n qué: se: baila .

*CHI: (0.4) ah@i la múzita [*] !

%err: múzita=música $PHO

%xepr: $i5:MMN:ORD:SST; $et4:RPR:OTH

*SIS: con música .

*SJR: muy bien (.) pasa [/] pasa a otra .

*MOT: (es)pérate@d (.) pero siéntate bien „ Beatriz .

*CHI: pasa [=! to SIS] !

*MOT: bien sentada „ vale@i ?

*MOT: ahí (.) <(es)pérate@d (.) ahí> [>].

*SIS: <quién hay> [<] ?

*CHI: <ita io> [?] [*].

%err: ita=quita $PHO; io=esto $PHO; ita io=quítame esto $MOR

%xepr: $i5:MMN:ORD:OMI;$i5:MMN:ORD:SST;$i5:MMN:ORD:OMI;$i5:MMN:ORD:OMI;

*MOT: te <vas a quitar> [=! deleted /s/ and /r/, dialectal] la chaqueta ?

*CHI: 0 [=! taking off her jacket] .

*MOT: venga@i sí (.) que vienes mu(y)@d prepara(da)@d tú con la chaqueta

igual que la hermana y: +//.

*SIS: quién hay ?

*CHI: ezo [*] [=! pointing to the pic].

%err: ezo=eso $PHO.

%xepr: $i5:MQT:RVP:VUT

*SIS: pero quién hay ?

*SJR: quién hay no (.) qué .

*SIS: bueno@i [=! looking to SJR] [>] .

*MOT: qué es [<] lo que hay ?

*SIS: qué es lo que hay ?

*SJR: venga@i qué hay en el cuento ?

*SJR: <quién hay> [>]?

*CHI: xxx xxx xxx [<].

*SIS: qué ha dicho ?

%sit: SIS looks at the pic so that she can identify what CHI has said.

*CHI: xxx xxx .

*SIS: ya: pero: a ver@i [=! deleted /r/, dialectal] .

*MOT: qué [/] <qué ves> [/] qué ves [=! deleted /s/, dialectal] „ Beatriz

?

*SIS: tú qué estás [=! deleted /s/, dialectal] viendo aquí ?

*MOT: qué ves en la estampa „ vida ?

*MOT: Beatriz !

%sit: CHI is distracted and tries to open a cupboard close to her.

*SIS: Beatriz ‡ tú qué estás viendo aquí ?

*MOT: (es)pérate@d (es)pérate@d qué ves [=! deleted /s/, dialectal] en la

estampa ?

*CHI: e: .

%xepr: $et3:DRA:FIL

*MOT: qué hay ?

*CHI: 0 [=! points to the picture]. [+ trn]

%xepr: $et3:GSA

*MOT: eso qué es [=! deleted /s/, dialectal] ?

*MOT: mira@i (.) esto qué es [=! deleted /s/, dialectal] ?

*CHI: este quién es [=! deleted /s/, dialectal] ?

*CHI: entana [*].

%err: entana=una ventana $PHO.

%xepr: $i5:MMN:ORD:OMI; $i5:MMN:ORD:OMI;

*MOT: ah@i la ventana [>] !

*SIS: una ventana [<] !

*MOT: y dónde está la ventana ?

*CHI: aquí [=! points to the pic ].

%xepr: $i5:MQT:RVP:VUT:LIT

*MOT: sí pero eso qué es [=! deleted /s/, dialectal] ?

*MOT: <las ventanas> [=! deleted /s/, dialectal] dónde están ?

*CHI: una: dos [=! counts the windows in the pic] .

%xepr: $i5:MRL:ASW:TNG:ICOM

*SIS: dos pero: en dónde están <las ventanas> [=! deleted /s/, dialectal] ?

*SIS: mira@i ahí hay una ventana y en dónde <estamos nosotros>

[=! deleted /s/, dialectal] ?

*CHI: aquí [=! points to the pic].

%xepr: $i5:MRL:ASW:NRL:PER

*SIS: pero en qué sitio estamos ?

*CHI: aquí [=! points to the pic].

%xepr: $i5:MRL:ASW:NRL:PER

*MOT: eso qué es [/] qué es [=! deleted /s/, dialectal] ?

*CHI: papal [*].

%err: papal=papel $PHO

%xepr: $i5:MRL:ASW:NRL:LIT

*MOT: no: .

*SJR: no pasa nada .

*MOT: la ventana está en una: +//.

*SJR: ponlo encima de la mesa a ver si señala .

*SIS: 0 [=! puts the pic on the table]. [+ trn]

*CHI: 0 [=! taps the pic repeatedly]. [+ trn]

%xepr: $et3:GSA

*MOT: en una qué ?

*CHI: 0.

*SIS: este quién es [=! deleted /s/, dialectal] este quién es

[=! deleted /s/, dialectal]?

*CHI: niño .

%err: niño=un niño $MOR

%xepr: $i5:MMN:ORD:OMI

*SIS: y qué está haciendo el niño ?

*CHI: e: .

%xepr: $et3:DRA:FIL.

*SIS: Beatriz [=! pretends she is smelling something].

*CHI: 0 [=! mimics SIS]. [+ trn]

%xepr: $et3:GSA; $i5:MRL:ASW:ICOM:ECO

*SIS: 0 [=! laughs].

*SJR: enséñale la del perro .

*SIS: la del perro.

*SJR: venga@i (.) qué hay ahí „ Beatriz ?

*SJR: fíjate@i (.) mira@i !

*MOT: mira@i „ Beatriz .

*SJR: <mira@i „ Beatriz> [>] .

*SIS: Beatriz ‡ ven [<] .

*CHI: 0 [=! taps the pic repeatedly]. [+ trn]

%xepr: $et3:GSA

*SJR: qué es eso [>] ?

*MOT: qué [<] [/-] eso qué es [=! deleted /s/, dialectal] ?

*SJR: xxx xxx enseñao [?] a señalar (.) te das cuenta [=! to MOT] ?

*MOT: sí .

*CHI: a [*] Dana .

%err: a=la $PHO

%xepr: $i5:MMN:ORD:OMI

*MOT: no .

*SIS: no (.) es [>] +//.

*MOT: ah@i Dana [<] !

*MOT: <sabes lo que es> [=! deleted /s/, dialectal] ?

*SIS: Dana [=! smiling] <es [=! deleted /s/, dialectal] que:> [>] +/.

*SJR: una perra .

*SIS: +, <una amiga de:> [/-] la amiga de mi padre pues

[=! deleted /s/, dialectal] tiene: una perra que se llama Dana .

*SIS: y ahora a <todos los perros que ve: pues les>

[=! deleted /s/, dialectal] llama Dana.

*SJR: normal (.) a ver@i y qué hace la perra (.) Dana ?

*SIS: qué está haciendo la perra ?

*CHI: Dana [>].

%xepr: $i5:MRL:ASW:PER

*SJR: qué hace [<] ?

*MOT: pero qué hace Dana ?

*CHI: oliendo [*].

%err: oliendo=comiendo $LEX.

%xepr: $i5:MMN:ORD:SST

*SIS: comiendo .

*MOT: ah@i está comiendo pero +//.

*SIS: y qué come ?

*MOT: quédate tranquilita „ Beatriz <un poquito> [?] [>].

*SIS: qué come [<] ?

*CHI: agua .

%xepr: $i5:MRL:ASW:TNG

*SIS: no (.) agua no (.) bueno@i está comiendo pienso .

*SIS: pienso o: <una especie:> [/] una especie: de: puré (.) de pienso o

algo así.

@End
